# Supplementary material
Source: PubMed Central journal article supplement (PMC4023421)
Supplement: supp_blood-2013-08-520627_blood-2013-08-520627-1.pdf [file supp_blood-2013-08-520627_blood-2013-08-520627-1.pdf]

## **SUPPLEMENTARY MATERIALS**

### **MATERIALS AND METHODS**

Reagents and antibodies. Antibodies 8275 against the last 20 amino acids of the  $\beta 3$  C-terminus,<sup>1</sup> 1B5 against the murine integrin  $\beta 3$  subunit,<sup>2</sup> D57 against human integrin  $\alpha \text{IIb}\beta 3$ <sup>3</sup>, PAC1 against activated human  $\alpha \text{IIb}\beta 3$ ,<sup>4</sup> and antibodies to human and mouse ADAP,<sup>5</sup> and SKAP-HOM (SKAP2),<sup>6</sup> have been described. A kindlin-3 antibody was raised in rabbits. Mouse monoclonal antibody against  $\beta$ -actin and rabbit monoclonal antibodies against kindlin-2, kindlin-3 and the N- or C-terminus of ADAP were from Abcam (Cambridge, MA); FLAG and talin mouse monoclonal antibodies were from Sigma-Aldrich (St. Louis, MO), and rat antibody against murine  $\alpha \text{IIb}$ , was from BD Biosciences (San Jose, CA). An antibody against the talin NH2 domain was from Santa Cruz Biotechnology (Dallas, TX). Odyssey secondary antibodies were from Licor Biosciences (Lincoln, NE). PAR4 receptor agonist peptide (AYPGKF) was from American Peptide Company (Sunnyvale, CA), and PAR1 peptide (SFLLRN) was from Sigma-Aldrich. Rhodamine-phalloidin, and secondary Alexa-conjugated antibodies were from Molecular Probes/Life Technologies (Eugene, OR). Fibrinogen was from Enzyme Research (Southbend, IN). Proximity Ligation Assay kit was from O-Link Bioscience (Uppsala, Sweden). Additional reagents were from Sigma-Aldrich, Thermo Scientific (USA) or GE Healthcare (San Diego, CA).

Mouse strains. Mice deficient in ADAP and SKAP2 have been described.<sup>7,8</sup> ADAP<sup>+/+</sup> and SKAP2<sup>+/+</sup> mice represented littermate controls. No differences in expression levels of  $\alpha \text{IIb}\beta 3$ , kindlin-3 or talin were found between platelets from wild type versus knockout mouse strains used. Mice were housed according to IACUC regulations.

Human and mouse platelet preparations. Washed platelets were prepared from human and mouse whole blood drawn into ACD anticoagulant, washed and resuspended in Walsh buffer (137 mM NaCl, 2.7 mM KCl, 1 mM  $\text{MgCl}_2 \cdot 6\text{H}_2\text{O}$ , 3.3 mM  $\text{NaH}_2\text{PO}_4 \cdot \text{H}_2\text{O}$ , 3.8 mM HEPES, 0.1% bovine serum albumin (BSA), 0.1% dextrose) as described.<sup>9</sup> Human blood was drawn from antecubital veins from consenting normal drug-free donors and mouse blood was drawn by cardiac puncture following euthanasia.

CHO cell culture, transfection and DNA constructs. HEK 293T, NIH 3T3 and CHO K1 cells that stably expressed  $\alpha \text{IIb}\beta 3$  ( $\alpha \text{IIb}\beta 3$ -CHO cells) were cultured in Dulbecco's Modification of Eagle's Medium (DMEM) (Cellgro, Manassas, VA) with non-essential amino acids, 10% fetal bovine serum (FBS), antibiotics, and L-glutamine. Cells were transiently-transfected using Lipofectamine (Life Technologies, Carlsbad, CA) according to the manufacturer's instructions, and harvested 48 hours later.  $\alpha \text{IIb}\beta 3$ -CHO cells were engineered to conditionally express the

human PAR1 thrombin receptor<sup>10</sup> and mouse talin using a tetracycline-inducible vector<sup>11</sup> (Invitrogen, Carlsbad, CA)<sup>12</sup> Vector pEFBOS/ADAP, with an inserted N-terminal 5' FLAG tag,<sup>5</sup> was used to express full-length ADAP (residues 1-783) and as a template to prepare ADAP truncation mutants, where the 5' primer containing a Sall site, TTAAGTTCGACGGATCTGCCATGGACTAC, was used together with reverse primers that inserted a stop codon and shifted the inherent EcoRV restriction recognition sequence in order to truncate ADAP to desired lengths. The PCR fragment was digested with Sall/EcoRV, and then replaced into similarly digested pEFBOS/ADAP. pEFBOS/ADAP(1-783) $\Delta$ 498-565 and pEFBOS/ADAP(1-615) $\Delta$ 498-565 were prepared by digesting the parent vectors with NdeI followed by re-ligation of the cut vector. PGEX4T1-GST/talin and PGEX4T3-kindlin-1 were from Asoka Banno (UC San Diego LA Jolla, CA)<sup>13</sup> and David Calderwood (Yale University, New Haven, CT),<sup>14</sup> respectively. GST constructs were expressed in E. Coli BL21 DE-pLys cells (EMD Biochemicals, San Diego, CA), purified using Glutathione-Sepharose beads, and dialyzed against PBS. pCMV/human kindlin-2 and pcDNA3.1/mouse kindlin-3 were gifts from Cary Wu (University of Pittsburgh, Pittsburgh, PA). EGFPN1 (Clontech, Mountain View, CA) was used as a transfection marker in CHO cell flow cytometry experiments. RIAM in  $\alpha$ IIB $\beta$ 3-PAR1/talin CHO cells was knocked down with an FG12/shRIAM lentiviral construct,<sup>13</sup> and a scrambled ROCK1 sequence was used as a negative shRNA control.<sup>15</sup> RIAM knockdown was verified by Western blotting.

## REFERENCES

1. Du X, Saido TC, Tsubuki S, Indig FE, Williams MJ, Ginsberg MH. Calpain cleavage of the cytoplasmic domain of the integrin beta 3 subunit. *J Biol Chem*. 1995;270(44):26146-26151.
2. Lengweiler S, Smyth SS, Jirouskova M, et al. Preparation of monoclonal antibodies to murine platelet glycoprotein IIb/IIIa (alphaIIbbeta3) and other proteins from hamster-mouse interspecies hybridomas. *Biochem Biophys Res Commun*. 1999;262(1):167-173.
3. O'Toole TE, Loftus JC, Du XP, et al. Affinity modulation of the alpha IIb beta 3 integrin (platelet GPIIb-IIIa) is an intrinsic property of the receptor. *Cell Regul*. 1990;1(12):883-893.
4. Shattil SJ, Hoxie JA, Cunningham M, Brass LF. Changes in the platelet membrane glycoprotein IIb. IIIa complex during platelet activation. *J Biol Chem*. 1985;260(20):11107-11114.
5. Musci MA, Hendricks-Taylor LR, Motto DG, et al. Molecular cloning of SLAP-130, an SLP-76-associated substrate of the T cell antigen receptor-stimulated protein tyrosine kinases. *J Biol Chem*. 1997;272(18):11674-11677.
6. Marie-Cardine A, Verhagen AM, Eckerskorn C, Schraven B. SKAP-HOM, a novel adaptor protein homologous to the FYN-associated protein SKAP55. *FEBS Lett*. 1998;435(1):55-60.
7. Peterson EJ, Woods ML, Dmowski SA, et al. Coupling of the TCR to integrin activation by Slap-130/Fyb. *Science*. 2001;293(5538):2263-2265.
8. Togni M, Swanson KD, Reimann S, et al. Regulation of in vitro and in vivo immune functions by the cytosolic adaptor protein SKAP-HOM. *Mol Cell Biol*. 2005;25(18):8052-8063.
9. Kasirer-Friede A, Cozzi MR, Mazzucato M, De Marco L, Ruggeri ZM, Shattil SJ. Signaling through GP Ib-IX-V activates alpha IIb beta 3 independently of other receptors. *Blood*. 2004;103(9):3403-3411.
10. Kahn ML, Nakanishi-Matsui M, Shapiro MJ, Ishihara H, Coughlin SR. Protease-activated receptors 1 and 4 mediate activation of human platelets by thrombin. *J Clin Invest*. 1999;103(6):879-887.
11. Yao F, Svensjo T, Winkler T, Lu M, Eriksson C, Eriksson E. Tetracycline repressor, tetR, rather than the tetR-mammalian cell transcription factor fusion derivatives, regulates inducible gene expression in mammalian cells. *Hum Gene Ther*. 1998;9(13):1939-1950.

12. Watanabe N, Bodin L, Pandey M, et al. Mechanisms and consequences of agonist-induced talin recruitment to platelet integrin  $\alpha$ IIb $\beta$ 3. *J Cell Biol.* 2008;181(7):1211-1222.
13. Banno A, Goult BT, Lee H, Bate N, Critchley DR, Ginsberg MH. Subcellular localization of talin is regulated by inter-domain interactions. *J Biol Chem.* 2012;287(17):13799-13812.
14. Harburger DS, Bouaouina M, Calderwood DA. Kindlin-1 and -2 directly bind the C-terminal region of beta integrin cytoplasmic tails and exert integrin-specific activation effects. *J Biol Chem.* 2009;284(17):11485-11497.
15. Tadokoro S, Shattil SJ, Eto K, et al. Talin binding to integrin beta tails: a final common step in integrin activation. *Science.* 2003;302(5642):103-106.

## SUPPLEMENTARY FIGURE LEGENDS

**Figure S1. Calpain-mediated cleavage of talin, kindlin-3 and  $\beta$ 3.** Human (A-C) or mouse (D-F) unstirred platelets were stimulated for the indicated times with SFLLRN (PAR1 agonist peptide) or AYPGKF (PAR4 agonist peptide), respectively, then lysed and western blotted with antibodies recognizing talin head domain (A,D),  $\beta$ 3 tail (B,E) and kindlin3 (C,F) cleavage products. As a positive control, platelets were activated with 0.5 U/ml thrombin under stirring conditions for 4 minutes at 37° C, as indicated.

**Figure S.2. His-kindlin-3 pull-down of ADAP.** Resting human platelet lysate was incubated with His-kindlin-3 overnight, and pull-downs were Western blotted for ADAP and for  $\beta$ 3, as described for Figure 1. Gels were stained with Coomassie Brilliant Blue to assess protein loading. Results shown are representative of two experiments.

**Figure S.3. Controls for proximity ligation assays.** A-F. Washed human platelets were stimulated with SFLLRN, plated on fibrinogen-coated coverslips for one hour, and processed as described in Methods for proximity ligation assay (PLA) detection of protein-protein interactions. Specific PLA signals appeared as bright red dots when ADAP-talin (A) and ADAP-kindlin (E) primary antibodies were used (arrows), but not when control pairs of IgG and primary antibody against ADAP (B), talin (C), kindlin-3 (F), or IgG/IgG (D) were used. Platelets were counterstained with FITC-phalloidin (green pseudocolor).

**Figure S4. GST-talin pull-down of ADAP from RIAM knockdown and control CHO cells expressing PAR1, talin and  $\alpha$ IIb $\beta$ 3.** A. Cells were transduced to express RIAM shRNA or

control shRNA. After transient-transfection with ADAP or vector cDNA (Mock), cells were analyzed for RIAM expression by Western blotting. **B.** Cell lysates were incubated with GST-talin, and the presence of ADAP in the pull downs was assessed by Western blotting. Gels were stained with Coomassie to assess protein loading. Results shown are representative of three experiments.

**Figure S5. ADAP associates with kindlins in CHO cells expressing PAR1, talin and  $\alpha$ IIB $\beta$ 3.** Cells were transiently-transfected with ADAP and kindlin-2 (or kindlin-3), plated on fibrinogen and processed for immunofluorescence microscopy. As indicated, cells were stained for ADAP and kindlins, and with rhodamine phalloidin to label F-actin. ADAP and kindlin-2 (top panels) were highly co-localized, especially at cell peripheries and in focal-adhesion structures, often together with actin (arrows). ADAP also co-localized with kindlin-3, but was more prevalent in cytoplasmic, punctate structures (middle panels). Bottom panels show staining with control IgG antibodies. Results are representative of three experiments.

**Figure S.6 Primary data for PAC-1 binding to transfected CHO cells. A,B.** CHO cells expressing PAR1, talin and  $\alpha$ IIB $\beta$ 3 were transiently-transfected with mock DNA, ADAP and/or kindlin-2 (**A**), or kindlin-3 (**B**) along with GFP as a transfection marker, and PAC-1 binding to transfected cells was assessed by flow cytometry as described in the Methods section. Results are presented from a single experiment showing specific PAC-1 binding normalized only for  $\alpha$ IIB $\beta$ 3 expression.

**Figure S.7.  $\alpha$ IIB $\beta$ 3 and ADAP expression levels in transfected CHO cells utilized for PAC-1 binding studies.** CHO cells expressing PAR1, talin and  $\alpha$ IIB $\beta$ 3 were transiently-transfected with mock DNA, ADAP and/or kindlin-2, or kindlin-3 along with GFP as a transfection marker. **A,B.** Densitometry of ADAP expression levels in CHO cells transfected with ADAP alone or together with kindlin-2 (**A**) or kindlin-3 (**B**). Average  $\alpha$ IIB $\beta$ 3 expression on transfected cells, determined by flow cytometry was similar between transfectants (**C**). Results represent the mean  $\pm$  SEM of at least five experiments.

**Figure S.8. Talin co-immunoprecipitation of  $\beta$ 3 and kindlin-3 from ADAP<sup>+/+</sup> and ADAP<sup>-/-</sup> mouse platelet lysate.** Resting or AYPGKF-stimulated mouse platelets were lysed and immunoprecipitated using an antibody against talin, and Western blots were prepared to detect  $\beta$ 3 and kindlin-3. ADAP deletion was verified by blotting ADAP<sup>+/+</sup> and ADAP<sup>-/-</sup> platelet lysate with an antibody against murine ADAP.

**Table 1. P values for experiments shown in Figure 6 A,B.** Student's unpaired t-test was used to determine probability values for FITC-fibrinogen binding to ADAP<sup>+/+</sup> (WT) and ADAP<sup>-/-</sup> (KO) platelets in the presence or absence of POW-2.

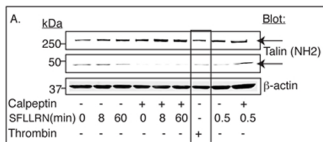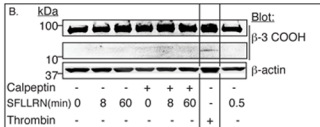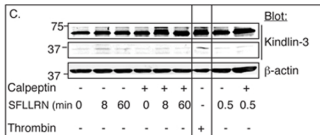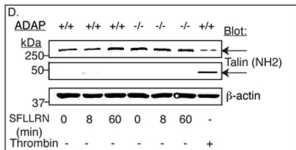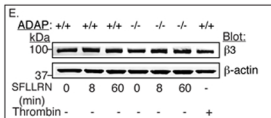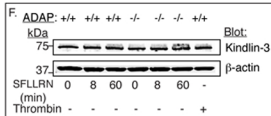

Figure S1

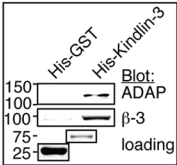

Figure S2



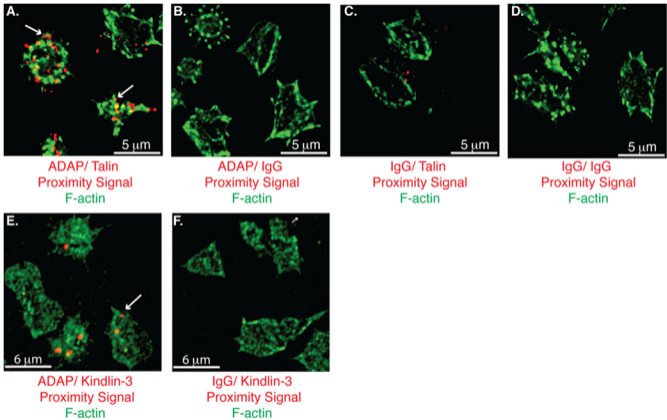

Figure S3

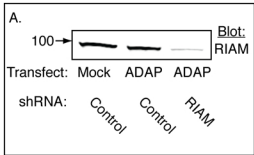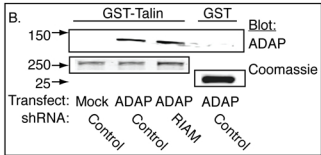

Figure S4

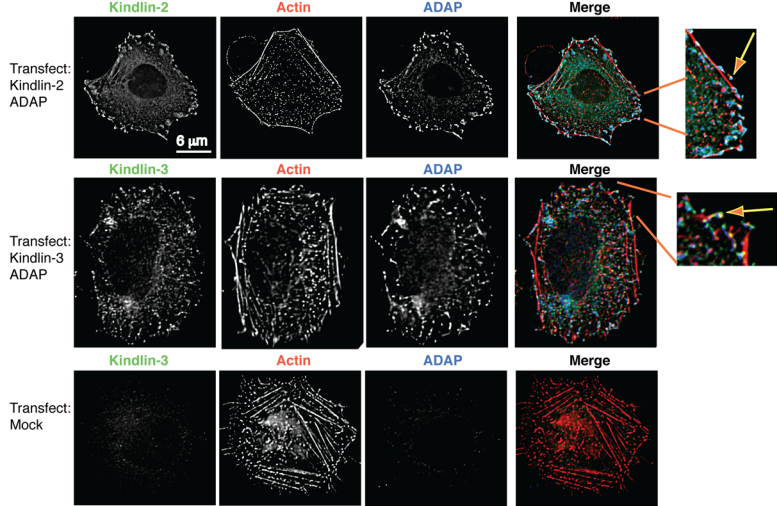

Figure S5

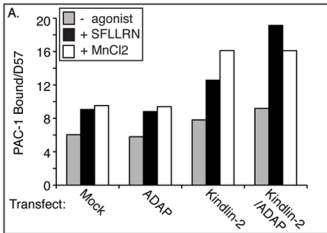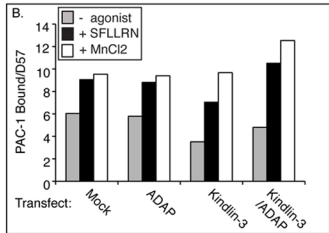

Figure S6

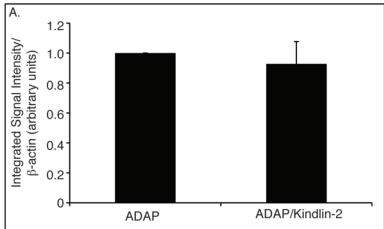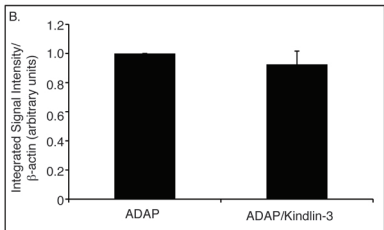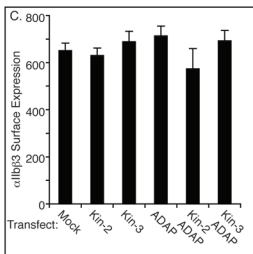

Figure S7

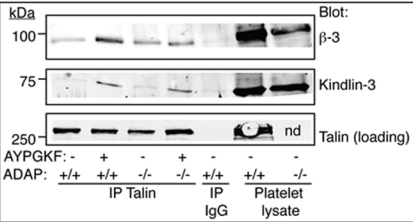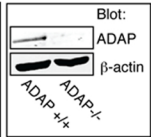

Figure S8

|                      | P Values |      |       |       |      |      |      |
|----------------------|----------|------|-------|-------|------|------|------|
| Par 4 ( $\mu$ M)     | 0        | 50   | 100   | 160   | 250  | 500  | 1000 |
| WT -POW-2: KO -POW-2 | 0.35     | 0.03 | 0.003 | 0.004 | 0.04 | 0.04 | 0.02 |
| WT -POW-2: WT +POW-2 | 0.31     | 0.03 | 0.005 | 0.002 | 0.02 | 0.07 | 0.07 |
| KO -POW-2: KO +POW-2 | 0.06     | 0.16 | 0.03  | 0.004 | 0.03 | 0.11 | 0.22 |
| WT +POW-2: KO +POW-2 | 0.32     | 0.46 | 0.19  | 0.18  | 0.07 | 0.01 | 0.03 |

Table S1
